# Supplementary material for: Root growth, water uptake, and sap flow of winter wheat in response to different soil water conditions
Source: Copernicus journal article supplement (doi:10.5194/hess-22-2449-2018), 2018-04-23
Supplement: Supplementary file 1 [file hess-22-2449-2018-supplement.pdf]

Supplement of Hydrol. Earth Syst. Sci., 22, 2449–2470, 2018  
<https://doi.org/10.5194/hess-22-2449-2018-supplement>  
© Author(s) 2018. This work is distributed under  
the Creative Commons Attribution 4.0 License.

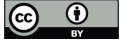

*Supplement of*

## **Root growth, water uptake, and sap flow of winter wheat in response to different soil water conditions**

**Gaochao Cai et al.**

*Correspondence to:* Gaochao Cai ([gaochao.cai@gmail.com](mailto:gaochao.cai@gmail.com))

The copyright of individual parts of the supplement might differ from the CC BY 4.0 License.

## Supplement

**Table S1.** RMSE, ME and  $d$  (see Eq. 14, 15 and 16) of the soil water content (SWC) and soil water pressure head (SWP) for the Feddes-Jarvis (FJ) and Couvreur (C) models in the three plots (P1: sheltered; P2: rainfed; P3: irrigated) of the stony (F1) and silty (F2) soils.

|    |      | SWC                              |         |                                  |         |                                  |        | SWP                       |        |                           |        |                           |        |
|----|------|----------------------------------|---------|----------------------------------|---------|----------------------------------|--------|---------------------------|--------|---------------------------|--------|---------------------------|--------|
|    |      | P1                               |         | P2                               |         | P3                               |        | P1                        |        | P2                        |        | P3                        |        |
|    |      | FJ                               | C       | FJ                               | C       | FJ                               | C      | FJ                        | C      | FJ                        | C      | FJ                        | C      |
|    |      | cm <sup>3</sup> cm <sup>-3</sup> |         | cm <sup>3</sup> cm <sup>-3</sup> |         | cm <sup>3</sup> cm <sup>-3</sup> |        | log <sub>10</sub> ([-cm]) |        | log <sub>10</sub> ([-cm]) |        | log <sub>10</sub> ([-cm]) |        |
| F1 | RMSE | 0.0241                           | 0.0226  | 0.0324                           | 0.0301  | 0.0238                           | 0.0246 | 0.7315                    | 0.6740 | 0.4874                    | 0.5159 | 0.3162                    | 0.3131 |
|    | ME   | -0.0017                          | -0.0036 | -0.0074                          | -0.0087 | -0.0019                          | 0.0012 | -0.0014                   | 0.0491 | 0.0607                    | 0.0994 | 0.0312                    | 0.0040 |
|    | $d$  | 0.9330                           | 0.9440  | 0.9121                           | 0.9248  | 0.9398                           | 0.9357 | 0.8453                    | 0.8770 | 0.9011                    | 0.8943 | 0.6530                    | 0.6300 |
| F2 | RMSE | 0.0460                           | 0.0471  | 0.0490                           | 0.0457  | 0.0654                           | 0.0606 | 0.5451                    | 0.5354 | 0.6378                    | 0.6403 | 0.6656                    | 0.6171 |
|    | ME   | 0.0001                           | 0.0058  | 0.0311                           | 0.0261  | 0.0476                           | 0.0404 | 0.1017                    | 0.0262 | -0.0397                   | 0.0474 | 0.0405                    | 0.1712 |
|    | $d$  | 0.8502                           | 0.8479  | 0.7843                           | 0.8027  | 0.6120                           | 0.6329 | 0.6145                    | 0.6069 | 0.7630                    | 0.7078 | 0.5421                    | 0.5073 |

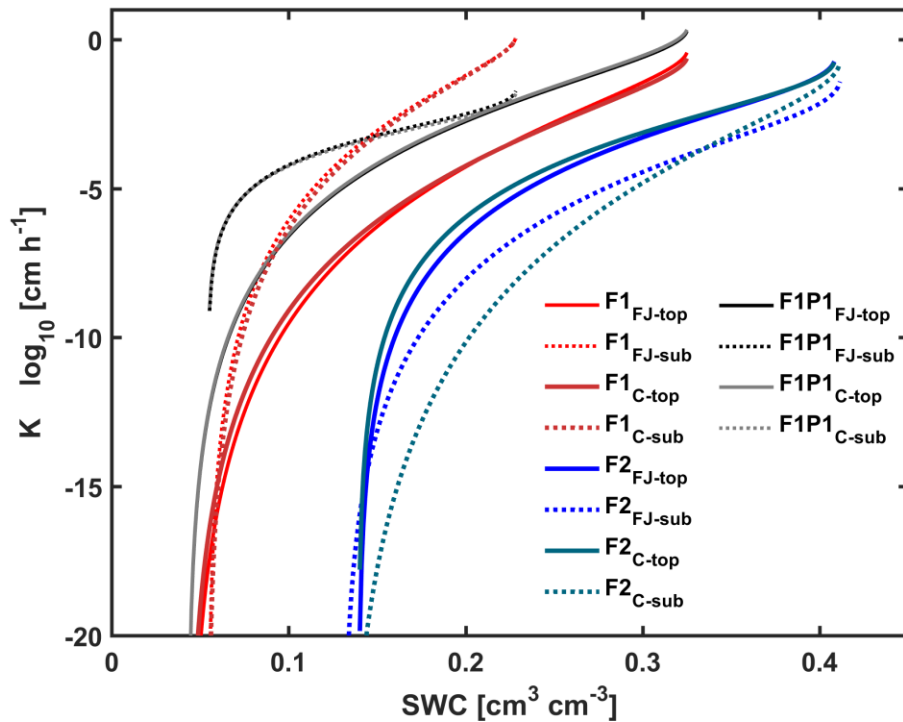

**Figure S1.** Relation between soil water content (SWC) and soil hydraulic conductivity (K) that was obtained by the Feddes-Jarvis (FJ) and Couvreur (C) models in the top- and subsoil of the stony (F1), the sheltered plot of the stony soil (F1P1), and silty (F2) soils.

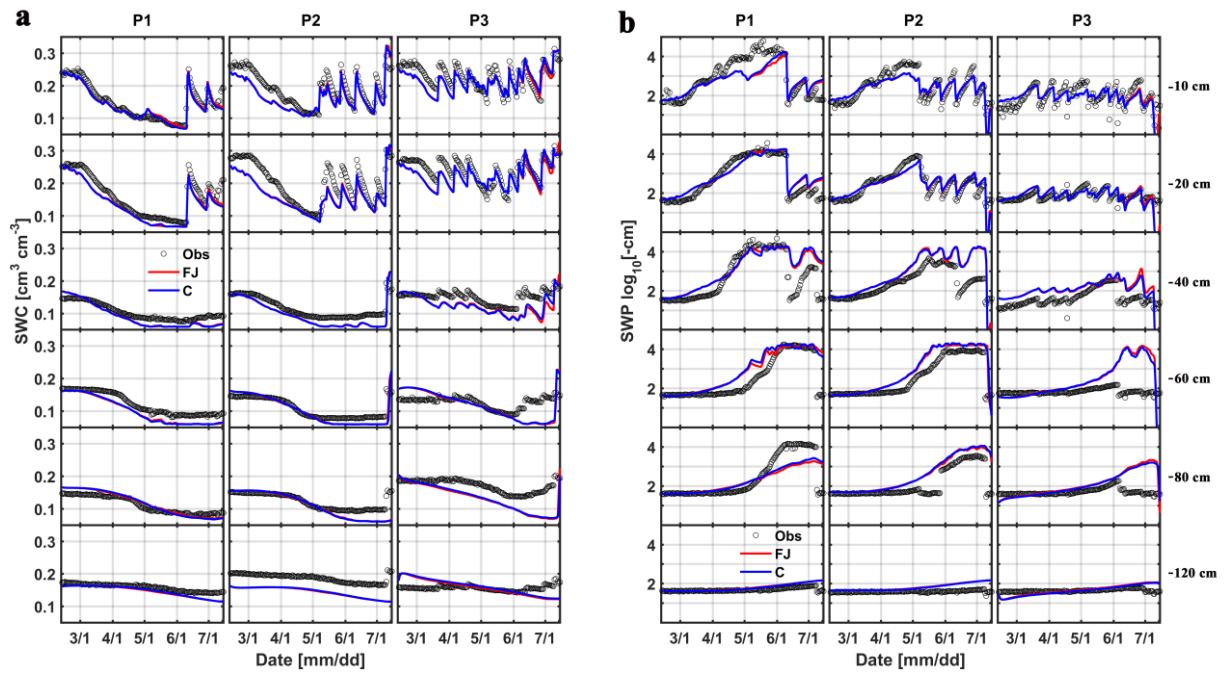

**Figure S2.** Simulated (a) soil water content (SWC) and (b) soil water pressure head (SWP) by the Feddes-Jarvis (FJ) and Couvreur (C) models at different depths in depths in the three plots (P1: sheltered; P2: rainfed; P3: irrigated) of the stony soil using the parameters that were obtained from the sheltered plot of the stony soil.
